# Supplementary material
Source: MDPI journal article supplement (https://www.mdpi.com/2079-9276/6/3/23)
Supplement: s1 [file s1]

## **Semi-structured Interviews Questions with Expedition Staff**

Expedition employee name:

Years of lecturing experience:

Year of experience in area of expertise:

Education level:

1. Please share with me your views regarding your lecturing style
2. What are your impressions/observations of the clients to the arctic
3. What are your impressions/observations of the clients on this trip.
4. What are your thoughts regarding the expedition team you are with
5. Please describe in general/ philosophical terms the amount of guest supervision you feel is appropriate in Arctic communities and in wilderness areas
6. Were there any special circumstances that impacted the trip positively or negatively (i.e. a special wildlife sighting, a diversion in the planned itinerary, a significant zodiac cruise, extreme weather, accidents, problem clients, etc.)
7. Please share with me your thoughts of the knowledge gained by the passengers from their experience on this trip
8. Do you feel that as a lecturer you have had an impact in this. Please explain  
What are your thoughts about how to organize and execute educational programming in expedition cruising? Any ideas? Any questions? Any Concerns?
