# Supplementary material
Source: MDPI journal article supplement (https://www.mdpi.com/2079-9276/6/3/23)
Supplement: s1 [file s1]

## **Semi-structured Interviews Questions with Cruisers**

1. Can you describe your experience on this expedition?
2. Have you participated in an Arctic trip before?  
~ if yes, how many times and how long ago?
3. How many other adventure cruises of one week or longer in length have you participated in?
4. Could you share with me your reasons for taking an expedition cruise to the Arctic.
5. Why did you choose this expedition company?
6. What do you consider was the best activity or activities on the expedition?
7. Why was this activity or these activities the best and what specific features contributed to this?
8. What was the most important or significant thing you learnt or achieved from this activity or activities?
9. What was the most important or significant thing you learnt from the trip overall?
10. Could you share with me your thoughts on the expedition team we travelled with?
11. Is there anything you would like to add?
