# Supplementary material
Source: MDPI journal article supplement (https://www.mdpi.com/2079-9276/6/3/23)
Supplement: s1 [file s1]

## Questions posed by cruisers during presentations

|               |                                                                                              |
|---------------|----------------------------------------------------------------------------------------------|
|               | <b>Presentation: Tracking sea ice changes in the summer of 2014</b>                          |
| Comprehension | Q. What causes polynya                                                                       |
| Knowledge     | Q. There is a weekly summary, who measures                                                   |
| Comprehension | Q. What is the grey area?                                                                    |
| Comprehension | Q. Why is that area open?                                                                    |
| Comprehension | Q. Where are the Fulmars wintering?                                                          |
| Comprehension | Q. Would there be polar bears on the ice?                                                    |
| Comprehension | Q. Why are there some areas up North that are open and areas down south have more ice?       |
| Application   | Q. Why is there more ice in 2013/2014 then before?                                           |
| Application   | Q. El Nino pushing the jet stream, could that have an effect?                                |
| Comprehension | Q. If the ship had gone on the 28 <sup>th</sup> , would it have gotten through?              |
|               |                                                                                              |
|               | <b>Presentation: Arctic Geology, Geomorphology, and Glaciology</b>                           |
| Knowledge     | Q. Can you tell us about the Canadian Shield?                                                |
| Comprehension | Q. The concern is rising sea level on the coast. How does that relate to the depressed area? |
|               | * More questions were asked one on one, the researcher was unable to hear questions.         |
|               |                                                                                              |
|               | <b>Presentation: Life in an Arctic – living with polar bears</b>                             |
| Comprehension | Q. Why does the male polar bear stalk the female polar bear?                                 |
| Comprehension | Q. How does the fox avoid becoming food for the polar bear, since they follow behind ?       |
| Comprehension | Q. Do the male polar bears recognize its own cubs?                                           |
| Comprehension | Q. What is the male polar bear doing all winter?                                             |
| Comprehension | Q. Will a male kill the cubs to mate?                                                        |
| Comprehension | Q. Do brown bears and polar bears mate?                                                      |
| Comprehension | Q. Does the male mate only once or will he find multiple partners?                           |
| Knowledge     | Q. How does a polar bear make its kill?                                                      |
| Knowledge     | Q. As a defense against polar bears, if you didn't have a gun, how do you protect yourself?  |
| Comprehension | Q. What was the condition of the polar bear we saw?                                          |
| Comprehension | Q. How Does the female wean her cubs?                                                        |
| Comprehension | Q. Do you watch the satellite images or is there a system for that?                          |
| Comprehension | Q. Are the number of males to females about equal?                                           |
| Comprehension | Q. So when she has two cubs is it often on of each sex?                                      |
| Comprehension | Q. Do they have certain noises?                                                              |
| Comprehension | Q. What do humans do with the kill?                                                          |

|               |                                                                            |
|---------------|----------------------------------------------------------------------------|
| Comprehension | Q. Can you export the fur to the states?                                   |
| Comprehension | Q. Do communities need tags to kill polar bears?                           |
| Comprehension | Q. Can a community sell their tags?                                        |
| Comprehension | Q. How much does it cost for a sport hunter to buy a tag from a community? |
| Comprehension | Q. How does the management of tagging work ?                               |
|               |                                                                            |
|               | <b>Presentation: Arctic Animals and their remarkable adaptations</b>       |
| Comprehension | Q. What initiates hibernation or torpor ?                                  |
| Comprehension | Q. Have they tried to farm muskox?                                         |
| Comprehension | Q. Are they used for transportation?                                       |
| Comprehension | Q. Why do the arctic fox prepare its dead in rows and separate the heads?  |
|               |                                                                            |
|               | <b>Presentation: A whole world at your feet</b>                            |
| Comprehension | Q. Do the Inuit use the willow as a pain killer?                           |
| Knowledge     | Q. Does the ACA still exist?                                               |
| Comprehension | Q. Were there sages & grass – where are they today?                        |
| Comprehension | Q. Did the Inuit use flowers and plants as dyes? Is this traditional?      |
| Knowledge     | Q. How do plants survive up here?                                          |
|               |                                                                            |
|               | <b>Presentation: Whales and whaling</b>                                    |
| Comprehension | Q. Can you tell me more about the whale communications                     |
| Comprehension | Q. Do we actually know how many numbers there are today?                   |
|               |                                                                            |
|               | <b>Presentation: Arctic Bird Identification</b>                            |
| Comprehension | Q. Describe various birds they saw – asked for clarification on            |
|               |                                                                            |
|               |                                                                            |
|               | <b>Questions asked during recap relating to the environment</b>            |
| Comprehension | Q. The bear must be cold on the ice?                                       |
| Comprehension | Q. How do you identify a male/female?                                      |
| Comprehension | Q. What is the purpose of tasting the air?                                 |
| Comprehension | Q. Do they use their tongue for heat loss?                                 |
| Comprehension | Q. Are you saying the bears can see colour?                                |
| Comprehension | Q. How often do polar bears attack people?                                 |
| Comprehension | Q. What were the people doing?                                             |
| Comprehension | Q. Can polar bears retract their paws?                                     |
| Comprehension | Q. Why do the bears congregate in Churchill ?                              |
|               |                                                                            |
|               | <b>Film: People of a Feather</b>                                           |

|               |                                                                                                                             |
|---------------|-----------------------------------------------------------------------------------------------------------------------------|
| Comprehension | Q. Can you describe the sea ice habitats more ?                                                                             |
| Comprehension | Q. Can you share any impacts you've seen of hydroelectricity on marine environments?                                        |
| Comprehension | Q. What is being done now to provide a better way for energy storage and distribution?                                      |
| Comprehension | Q. What tools and techniques have you used for sea ice research ?                                                           |
| Comprehension | Q. What communities are involved in the monitoring programs?                                                                |
| Comprehension | Q. Can you provide more examples of science and Inuit knowledge integrating?                                                |
|               |                                                                                                                             |
|               | <b>Presentation: Climate change and The Arctic</b>                                                                          |
| Comprehension | Q. How is the climate changing the Arctic? How much are the glaciers, sea ice and permafrost really melting away each year? |
| Comprehension | Q. How much is sea levels expected to rise                                                                                  |
| Application   | Q. Are these changes natural?                                                                                               |
| Application   | Q. With the projected rise by of annual temperatures by 3-7°C, is that temperature even more so in the Arctic?              |
| Application   | Q. How much is the Arctic land covered by snow expected to decrease?                                                        |
| Application   | Q. How will Arctic warming affect the rest of the planet?                                                                   |
| Application   | Q. How will climate change impact the vegetation? More bugs? Wildfires?                                                     |
| Application   | Q. Could it change so much that farming could start ?                                                                       |
| Comprehension | Q. What about the polar bears? Will they be okay ?                                                                          |
| Application   | Q How would this impact the Arctic marine food web?                                                                         |
| Application   | Q. Would there be a highly likelihood of invasive species making there way to the Arctic/ have a lasting impact?            |
| Comprehension | Q. I've heard there are microorganisms that have been frozen for millennia, can you tell us more about that?                |
| Application   | Q. Have you seen an impact already? – what about the places we have visited?                                                |
